# Supplementary material for: Induction of toxicity in human colon cells and organoids by size- and composition-dependent road dust
Source: Royal Society of Chemistry journal article supplement (doi:10.1039/d2ra07500h), 2023-01-01
Supplement: d2ra07500h1.pdf [file d2ra07500h1.pdf]

**Electronic Supplementary Material**  
**Induction of toxicity in human colon cells and organoids by size- and composition-dependent road dust**

**Table of contents**

**Tables**

|           |                                                                                                                                                                    |
|-----------|--------------------------------------------------------------------------------------------------------------------------------------------------------------------|
| Table S1  | Total elemental analysis data of road dust 1-4                                                                                                                     |
| Table S2  | PCR array results of expression level of 84 inflammatory bowel disease-related genes upon addition of road dust including 5 housekeeping genes used for validation |
| Table S3  | Forward and reverse primer sequence used for qPCR                                                                                                                  |
| Figure S1 | Colon organoid characterization                                                                                                                                    |
| Figure S2 | % colon organoid viability upon addition of road dust                                                                                                              |
| Figure S3 | road dust particle size and surface charge dependent colon organoid toxicity                                                                                       |

|              | TOC               |         | Elemental Analysis |         |         |         | XRF(wt%) |      |      |      |       |       |        |      |      |      |        |       |      |        |       |       |        |       |       |       | py-GC-MS (peak area(unit: au)) |                |               |            |
|--------------|-------------------|---------|--------------------|---------|---------|---------|----------|------|------|------|-------|-------|--------|------|------|------|--------|-------|------|--------|-------|-------|--------|-------|-------|-------|--------------------------------|----------------|---------------|------------|
|              | TOC (proa d dust) | SD_TO C | C(wt %)            | H(wt %) | N(wt %) | S(wt %) | Na       | Mg   | Al   | Si   | P     | S     | Cl     | K    | Ca   | Ti   | Cr     | Mn    | Fe   | Ni     | Cu    | Zn    | Rb     | Sr    | Zr    | Ba    | Pb                             | Caliphatic. HC | Caromatic. HC | Cphenol ic |
| Roa d dust 1 | 4.09              | 0.48    | 6.333              | 0.754   | 0.154   | 0.046   | 0        | 1.42 | 13.4 | 46.2 | 0.193 | 1.05  | 0.0714 | 6.53 | 14.6 | 1.37 | 0.0767 | 0.43  | 12.3 |        | 0.055 | 1.8   | 0.0635 | 0.112 | 0.055 |       | 0.148                          | 0              | 186,143       | 0          |
| Roa d dust 2 | 4.40              | 0.88    | 5.986              | 0.718   | 0.257   | 0.032   | 0.831    | 1.82 | 15   | 38.4 | 0.59  | 0.844 | 0.894  | 6.66 | 6.24 | 1.52 | 1.7    | 0.352 | 23.5 | 0.451  | 0.36  | 0.356 | 0.106  | 0.156 | 0.183 |       |                                | 280,346        | 54,594        | 312,699    |
| Roa d dust 3 | 4.44              | 0.81    | 4.717              | 0.592   | 0.256   | 0.000   | 0.88     | 1.12 | 14.7 | 47.4 | 0.44  | 0.578 | 0.0997 | 7.37 | 12.4 | 1.37 | 0.0599 | 0.426 | 12   | 0.0323 | 0.075 | 0.299 | 0.0817 | 0.145 | 0.134 | 0.328 | 0.0639                         | 268,937        | 0             | 64,633     |
| Roa d dust 4 | 2.81              | 0.28    | 4.918              | 0.423   | 0.000   | 0.000   | 0.871    | 1.1  | 11.3 | 42.1 | 0.258 | 0.963 | 0.173  | 5.3  | 13.8 | 1.28 | 0.179  | 0.637 | 20.4 | 0.0601 | 0.153 | 0.549 | 0.0596 | 0.145 | 0.161 | 0.302 | 0.0755                         | 133,245        | 0             | 0          |

Table S1. Total elemental analysis data of road dust 1-4

| Position | Symbol  | Up-Down Regulation (comparing to control group) |          |                 |          |
|----------|---------|-------------------------------------------------|----------|-----------------|----------|
|          |         | SRM 1648a                                       |          | 1               |          |
|          |         | Fold Regulation                                 | Comments | Fold Regulation | Comments |
| A01      | ABCB1   | -1.26                                           |          | -1.43           |          |
| A02      | ALDOB   | <b>3.17</b>                                     |          | <b>5.05</b>     |          |
| A03      | ATG16L1 | -1.64                                           |          | -1.54           |          |
| A04      | C3      | <b>2.27</b>                                     |          | <b>2.15</b>     |          |
| A05      | C4BPB   | -1.04                                           |          | -1.15           |          |
| A06      | CASP1   | -1.26                                           |          | -1.20           |          |
| A07      | CCL11   | 1.00                                            |          | -1.18           |          |
| A08      | CCL2    | 1.33                                            |          | -1.45           |          |
| A09      | CCL20   | <b>9.09</b>                                     |          | <b>11.60</b>    |          |
| A10      | CCL25   | 1.17                                            |          | 1.15            |          |
| A11      | CCL5    | 1.33                                            |          | -1.15           |          |
| A12      | CCR1    | -1.03                                           |          | -1.14           |          |
| B01      | CCR2    | 1.07                                            |          | -1.52           |          |
| B02      | CCR5    | 1.11                                            |          | -1.34           |          |
| B03      | CCR9    | 1.35                                            |          | -1.42           |          |
| B04      | CD55    | 1.15                                            |          | 1.22            |          |
| B05      | CHI3L1  | -1.19                                           |          | -1.54           |          |
| B06      | CR2     | -1.14                                           |          | -1.11           |          |
| B07      | CSTA    | -1.12                                           |          | -1.64           |          |
| B08      | CX3CL1  | -1.02                                           |          | -1.13           |          |
| B09      | CX3CR1  | 1.12                                            |          | -1.46           |          |
| B10      | CXCL1   | <b>6.56</b>                                     |          | <b>9.62</b>     |          |
| B11      | CXCL10  | -1.37                                           |          | -1.44           |          |
| B12      | CXCL11  | -1.51                                           |          | -1.33           |          |
| C01      | CXCL12  | 1.56                                            |          | -1.12           |          |
| C02      | CXCL2   | <b>2.59</b>                                     |          | <b>4.22</b>     |          |
| C03      | CXCL3   | <b>3.21</b>                                     |          | <b>6.26</b>     |          |
| C04      | CXCL9   | -1.44                                           |          | -1.30           |          |
| C05      | CXCR1   | 1.00                                            |          | -1.40           |          |
| C06      | CXCR3   | 1.42                                            |          | -1.05           |          |
| C07      | DEFA5   | -1.01                                           |          | -1.16           |          |
| C08      | DEFA6   | 1.02                                            |          | -1.40           |          |
| C09      | EDN3    | 1.38                                            |          | -1.04           |          |
| C10      | EGR3    | -1.43                                           |          | -1.71           |          |
| C11      | FPR1    | 1.00                                            |          | -1.30           |          |
| C12      | GCG     | -1.26                                           |          | -1.14           |          |
| D01      | HLA-    | -1.03                                           |          | -1.13           |          |

|     |          |              |  |              |  |
|-----|----------|--------------|--|--------------|--|
|     | DQA1     |              |  |              |  |
| D02 | HLA-DRA  | -1.12        |  | -1.19        |  |
| D03 | HLA-DRB1 | -1.32        |  | -1.77        |  |
| D04 | HSP90B1  | -1.77        |  | -1.61        |  |
| D05 | HSPA5    | -1.84        |  | -1.43        |  |
| D06 | IFNG     | -1.01        |  | -1.13        |  |
| D07 | IL13     | -1.20        |  | -1.43        |  |
| D08 | IL17A    | -1.17        |  | -1.44        |  |
| D09 | IL1B     | 1.06         |  | -1.05        |  |
| D10 | IL1RN    | 1.05         |  | 1.24         |  |
| D11 | IL23A    | -1.05        |  | -1.37        |  |
| D12 | IL2RA    | -1.15        |  | -1.38        |  |
| E01 | IL5      | -1.52        |  | -1.33        |  |
| E02 | IL6      | 1.03         |  | -1.05        |  |
| E03 | CXCL8    | <b>5.37</b>  |  | <b>8.73</b>  |  |
| E04 | IRF5     | 1.02         |  | -1.35        |  |
| E05 | ISG15    | -1.99        |  | -1.30        |  |
| E06 | ITGB2    | 1.42         |  | -1.17        |  |
| E07 | LCN2     | <b>3.08</b>  |  | <b>5.08</b>  |  |
| E08 | LTB      | <b>3.74</b>  |  | <b>6.30</b>  |  |
| E09 | LYZ      | -1.39        |  | -1.47        |  |
| E10 | MMP1     | 1.09         |  | 1.24         |  |
| E11 | MMP10    | -1.48        |  | -1.35        |  |
| E12 | MMP3     | -1.20        |  | -1.13        |  |
| F01 | MMP7     | 1.88         |  | 1.31         |  |
| F02 | MUC1     | <b>2.02</b>  |  | <b>2.37</b>  |  |
| F03 | NOD2     | 1.06         |  | -1.31        |  |
| F04 | NOS2     | -1.25        |  | -1.55        |  |
| F05 | NR3C2    | -1.15        |  | -1.52        |  |
| F06 | PCK1     | <b>-2.31</b> |  | <b>-2.61</b> |  |
| F07 | PECAM1   | -1.04        |  | -1.24        |  |
| F08 | REG1A    | -1.24        |  | -1.46        |  |
| F09 | REG1B    | -1.00        |  | 1.00         |  |
| F10 | S100A8   | -1.13        |  | -1.72        |  |
| F11 | S100A9   | 1.03         |  | -1.02        |  |
| F12 | SAA1     | <b>2.90</b>  |  | <b>4.81</b>  |  |
| G01 | SELE     | 1.23         |  | 1.14         |  |
| G02 | SELL     | 1.05         |  | -1.10        |  |
| G03 | SOD2     | 1.90         |  | <b>3.24</b>  |  |

|     |       |       |  |       |  |
|-----|-------|-------|--|-------|--|
| G04 | STAT1 | -1.19 |  | -1.12 |  |
| G05 | STAT3 | -1.19 |  | -1.49 |  |
| G06 | TDO2  | -1.03 |  | -1.27 |  |
| G07 | TFF1  | 1.24  |  | 1.62  |  |
| G08 | TIMP1 | -1.30 |  | 1.11  |  |
| G09 | TNF   | 1.09  |  | -1.05 |  |
| G10 | TYK2  | -1.70 |  | -1.88 |  |
| G11 | UBD   | 1.23  |  | 1.29  |  |
| G12 | VWF   | 1.30  |  | -1.14 |  |
| H01 | ACTB  | 1.42  |  | 1.94  |  |
| H02 | B2M   | 1.18  |  | 1.39  |  |
| H03 | GAPDH | -1.24 |  | -1.39 |  |
| H04 | HPRT1 | 1.03  |  | -1.43 |  |
| H05 | RPLP0 | -1.34 |  | -1.45 |  |

<5 Housekeeping genes>

**ACTB** - Actin, beta

**B2M** - Beta-2-microglobulin

**GAPDH** - Glyceraldehyde-3-phosphate dehydrogenase

**HPRT1** - Hypoxanthine phosphoribosyltransferase 1

**RPLP0** - Ribosomal protein, large, P0

**Table S2.** Expression level of 84 colon inflammatory-related genes evaluated against SRM1648a and road dust 1 (2 mg/mL) treated colon organoids.

**ALDOB (NM\_000035)**

|         |                        |
|---------|------------------------|
| Forward | AGCCTCGCTATCCAGGAAAACG |
| Reverse | TGGCAGTGTTCCAGGTCATGGT |

**C3 (NM\_000064)**

|         |                        |
|---------|------------------------|
| Forward | GTGGAAATCCGAGCCGTTCTCT |
| Reverse | GATGGTTACGGTCTGCTGGTGA |

**CCL20 (NM\_004591)**

|         |                          |
|---------|--------------------------|
| Forward | AAGTTGTCTGTGTGCGCAAATCC  |
| Reverse | CCATTCCAGAAAAGCCACAGTTTT |

**CXCL1 (NM\_001511)**

|         |                        |
|---------|------------------------|
| Forward | AGCTTGCCTCAATCCTGCATCC |
| Reverse | TCCTTCAGGAACAGCCACCAGT |

**CXCL2 (NM\_002089)**

|         |                        |
|---------|------------------------|
| Forward | GGCAGAAAGCTTGTCTCAACCC |
| Reverse | CTCCTTCAGGAACAGCCACCAA |

**CXCL3 (NM\_002090)**

|         |                          |
|---------|--------------------------|
| Forward | TTCACCTCAAGAACATCCAAAGTG |
| Reverse | TTCTTCCCATTCTTGAGTGTGGC  |

**CXCL8 (NM\_000584)**

|         |                         |
|---------|-------------------------|
| Forward | GAGAGTGATTGAGAGTGGACCAC |
| Reverse | CACAACCCTCTGCACCCAGTTT  |

**LCN2 (NM\_005564)**

|         |                        |
|---------|------------------------|
| Forward | GTGAGCACCAACTACAACCAGC |
| Reverse | GTTCCGAAGTCAGCTCCTTGGT |

**LTB (NM\_002341)**

|         |                        |
|---------|------------------------|
| Forward | GGTTTCAGAAGCTGCCAGAGGA |
| Reverse | CGTCAGAAACGCCTGTTCCTTC |

**MUC1 (NM\_002456)**

|         |                         |
|---------|-------------------------|
| Forward | CCTACCATCCTATGAGCGAGTAC |
| Reverse | GCTGGGTTTGTGTAAGAGAGGC  |

**PCK1 (NM\_002591)**

|         |                         |
|---------|-------------------------|
| Forward | CATTGCCTGGATGAAGTTTGACG |
| Reverse | GGGTTGGTCTTCACTGAAGTCC  |

**SAA1 (NM\_000331)**

|         |                         |
|---------|-------------------------|
| Forward | TCGTTCCCTTGGCGAGGCTTTTG |
| Reverse | AGGTCCCCTTTTGGCAGCATCA  |

**SOD2 (NM\_000636)**

|         |                        |
|---------|------------------------|
| Forward | CTGGACAAACCTCAGCCCTAAC |
| Reverse | AACCTGAGCCTTGGACACCAAC |

**Table S3.** Forward and reverse primer sequence used for qPCR.

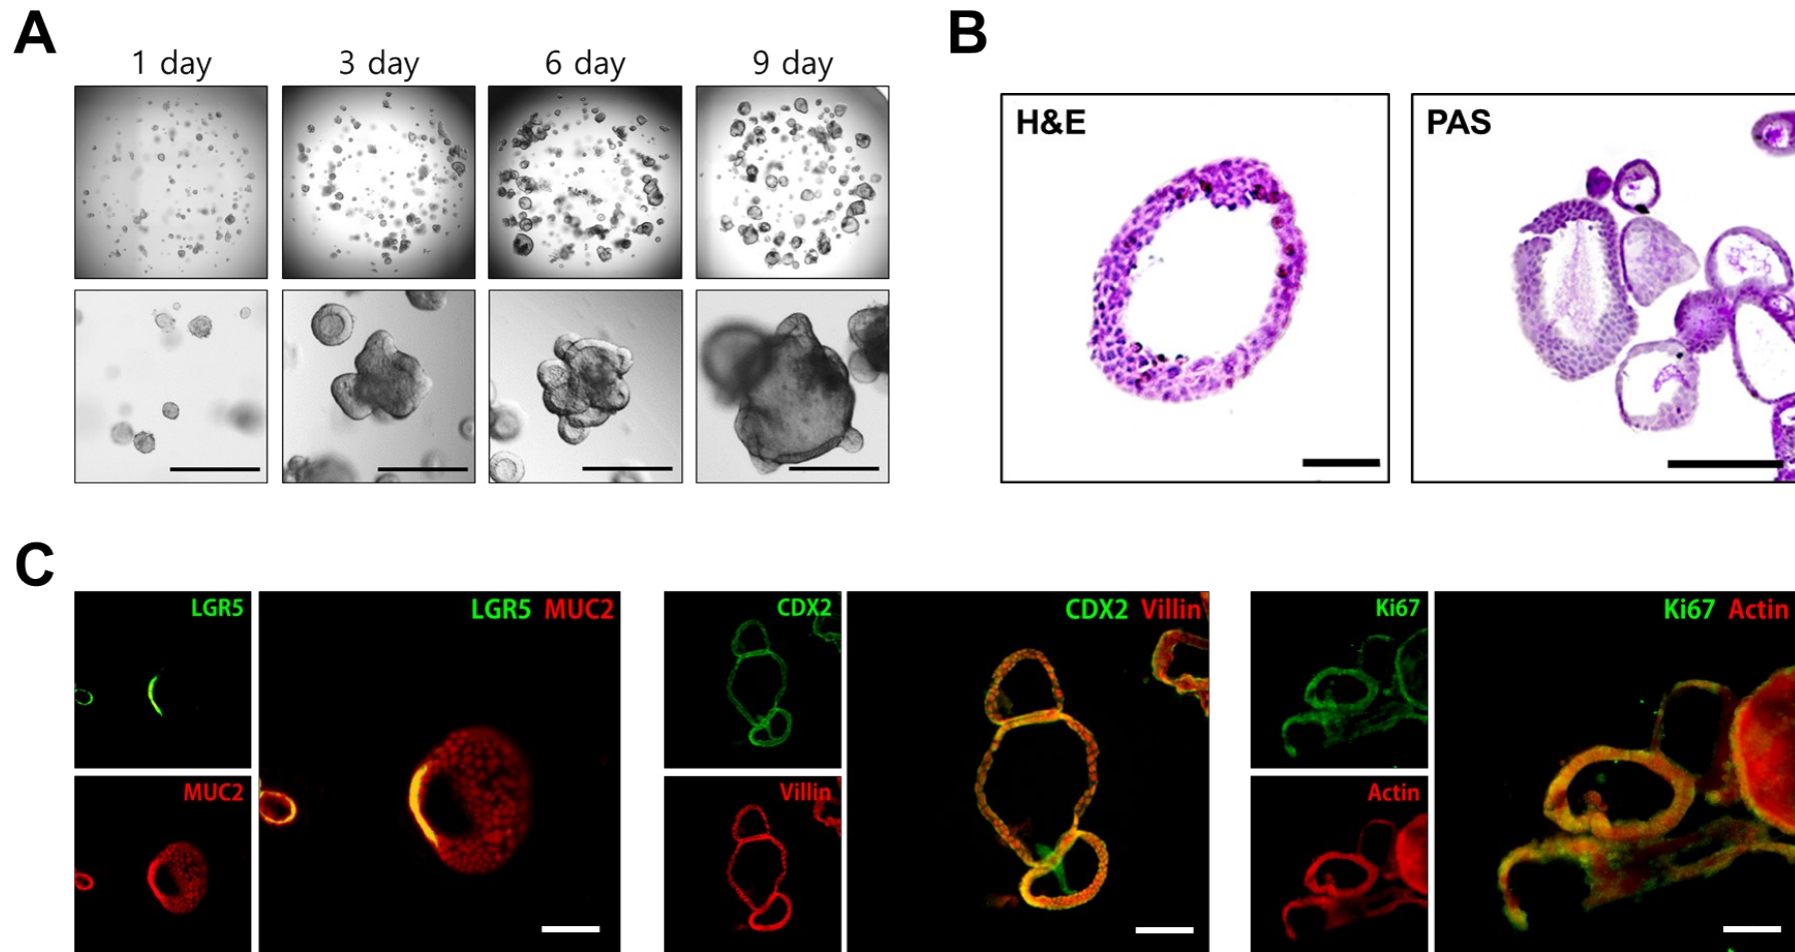

**Figure S1.** (A) BF images (B) H&E and PAS staining (C) Immunofluorescence staining of colon organoids.



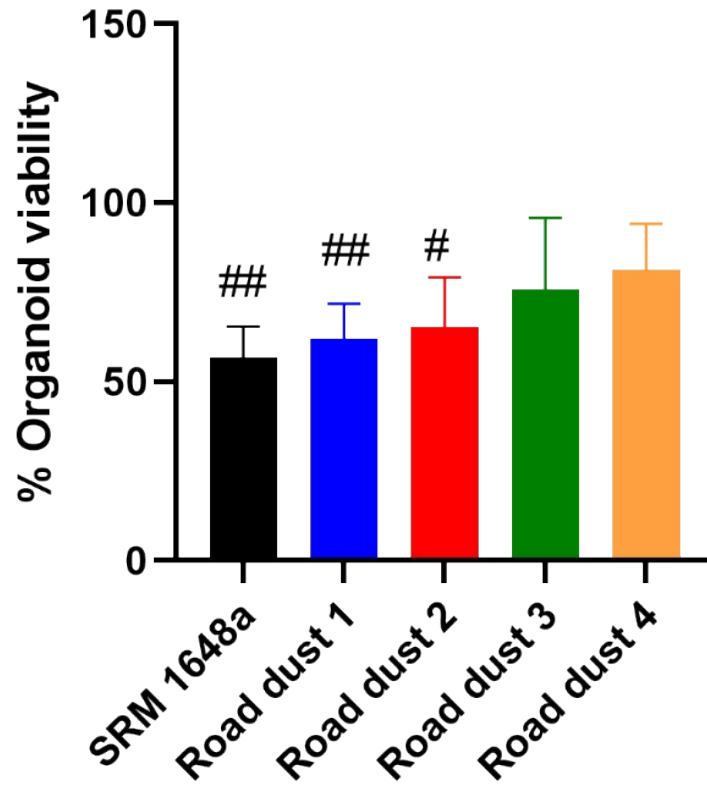

**Figure S2.** % colon organoid viability upon addition of 2 mg/mL road dust. Error bars represent the standard deviation from three independent experiments. Statistical significance is denoted as # for  $P < 0.05$  and ## for  $P < 0.01$

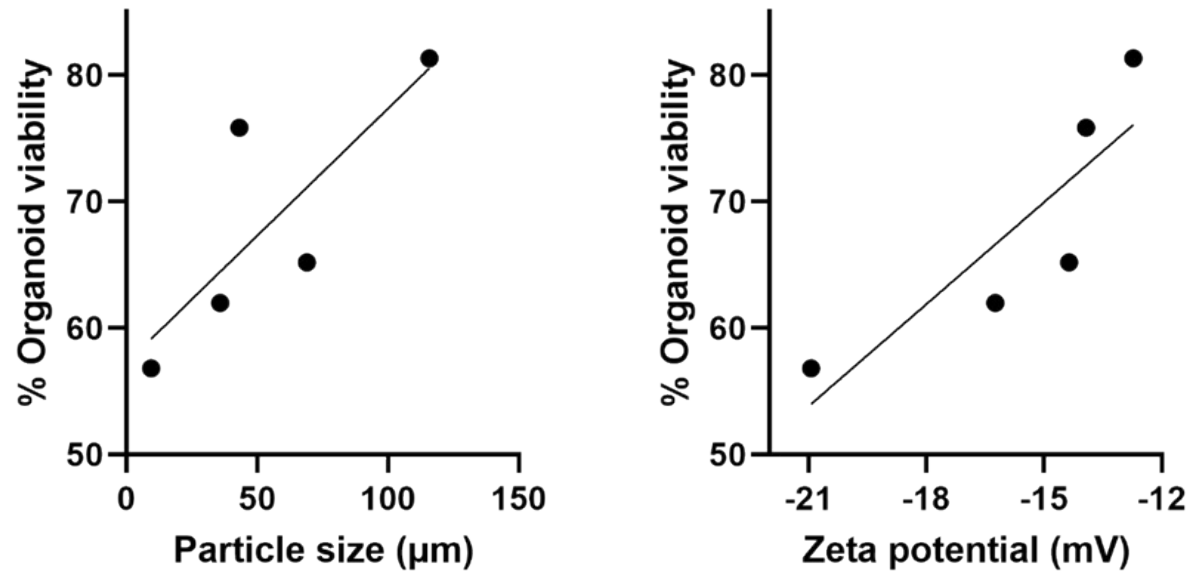

**Figure S3.** Road dust particle size (left) and surface charge (right) dependent human colon organoid toxicity.
